# Supplementary figures and images for: A Cluster Analysis Approach for Nocturnal Atmospheric Boundary Layer Height Estimation from Multi-Wavelength Lidar
Source: MDPI journal article supplement (doi:10.3390/atmos14050847), 2023-05-09

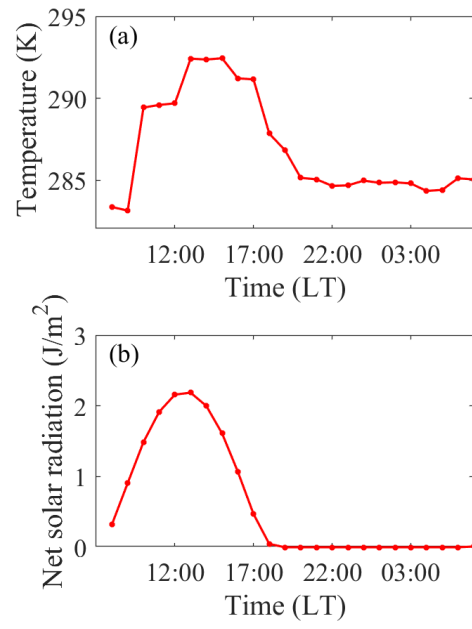

**Figure S1.** The variations of surface temperature and surface net radiation from ERA5 at 2 November 2015.

Supplement: s1 [file s1]
